# Supplementary material for: Characterization of a recurrent missense mutation in the forkhead DNA-binding domain of FOXP1
Source: PubMed Central journal article supplement (PMC6212433; doi:10.1038/s41598-018-34437-0), 2018-11-01
Supplement: 41598_2018_34437_MOESM1_ESM.pdf [file 41598_2018_34437_MOESM1_ESM.pdf]

Characterization of a recurrent missense mutation in the forkhead DNA-binding domain of  
*FOXP1*

Tyler B. Johnson<sup>1</sup>, Keegan Mechels<sup>1</sup>, Ruth Ellen Anderson<sup>1</sup>, Jacob T. Cain<sup>1</sup>, David A.  
Sturdevant<sup>1</sup>, Stephen Braddock<sup>3</sup>, Hailey Pinz<sup>3</sup>, Mark A. Wilson<sup>4</sup>, Megan Landsverk<sup>2</sup>, Kyle J.  
Roux<sup>1,2\*</sup>, Jill M. Weimer<sup>1,2\*</sup>

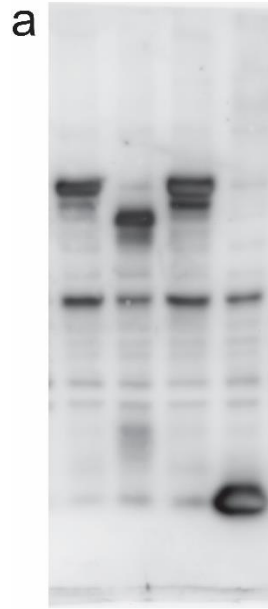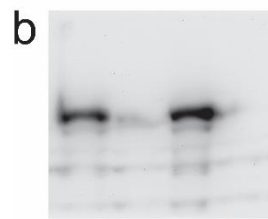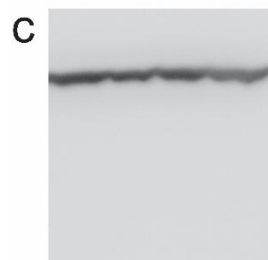

**Supplementary Figure 1: Expression of FOXP1 transcripts in HeLa cells.** Full length blots from Figure 2 in text.
